# Supplementary material for: Effects of telemedicine interventions on essential hypertension: a protocol for a systematic review and meta-analysis
Source: HighWire-hosted journal article supplement (doi:10.1136/bmjopen-2021-060376), 2022-09-01
Supplement: bmjopen-2021-060376supp001_data_supplement.pdf [file bmjopen-2021-060376supp001_data_supplement.pdf]

## Appendix 1 Search strategy

Our initial search syntax for resources such as PubMed is:

1. 'hypertension' [tiab] or 'blood pressure' [tiab]
2. 'remote' [tiab] or 'distance' [tiab] or 'electronic' [tiab] or 'communication' [tiab] or 'technology' [tiab]
3. 'cloud' [tiab] or 'cloud computing' [tiab] or 'computing' [tiab] or '5G' [tiab] or '4G' [tiab] or 'artificial' [tiab]
4. 'intelligent' [tiab] or 'smart' [tiab] or 'auto\*' [tiab] or 'machine' [tiab]
5. 'mobile' [tiab] or 'online' [tiab] or 'on-line' [tiab] or 'wireless' [tiab]
6. 'data' [tiab] or 'IoT' [tiab] or 'connected' [tiab] or 'AI' [tiab] or 'network' [tiab]
7. 'software' [tiab] or 'telecom' [tiab] or 'system' [tiab] or 'module' [tiab]
8. 'platform' [tiab] or 'integration' [tiab] or 'storage' [tiab]
9. 'shared' [tiab] or 'synchronized' [tiab] or 'integrated' [tiab] or 'development' [tiab]
10. 'IT' [tiab] or 'service' [tiab] or 'contactless' [tiab] or 'integration' [tiab]
11. 'APP' [tiab] or 'Android' [tiab] or 'IOS' [tiab]
12. 'Phone' [tiab] or 'Mobile' [tiab] or 'computer' [tiab] or 'device' [tiab] or 'video' [tiab]
13. 'audio' [tiab] or 'image' [tiab] or 'graphic' [tiab] or 'information' [tiab]
14. 'conference' [tiab] or 'training' [tiab] or 'program' [tiab] or 'programme' [tiab] or 'application' [tiab]
15. 'algorithm' [tiab] or 'code' [tiab] or 'public' [tiab] or 'language' [tiab]
16. OR #2 /#15
17. #1 AND #16
